# Supplementary material
Source: publisher figshare collection journal article supplement (https://acs.figshare.com/ndownloader/files/4166272)
Supplement: Supplementary file 1 [file 4166272]

## Supporting Information

# Effect of Lithium Doping into MIL-53(Al) through Thermal Decomposition of Anion Species on Hydrogen Adsorption

*Masaru Kubo, Atsushi Shimojima, Tatsuya Okubo*

Department of Chemical System Engineering, The University of Tokyo, 7-3-1 Hongo, Bunkyo-ku,  
Tokyo 113-8656, Japan

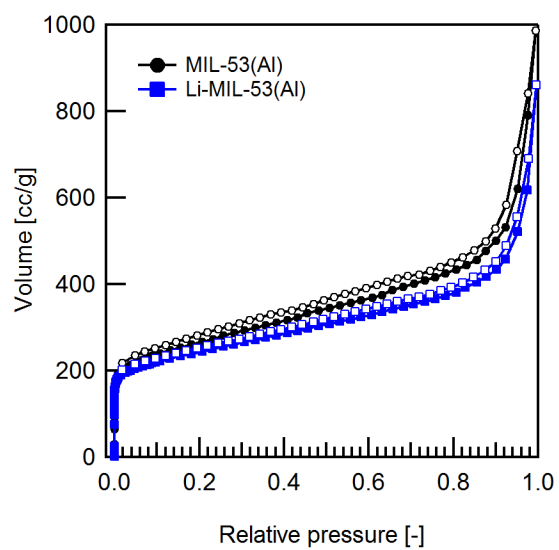

**Figure S1.** N<sub>2</sub> adsorption isotherms of MIL-53(Al) and Li-MIL-53(Al).

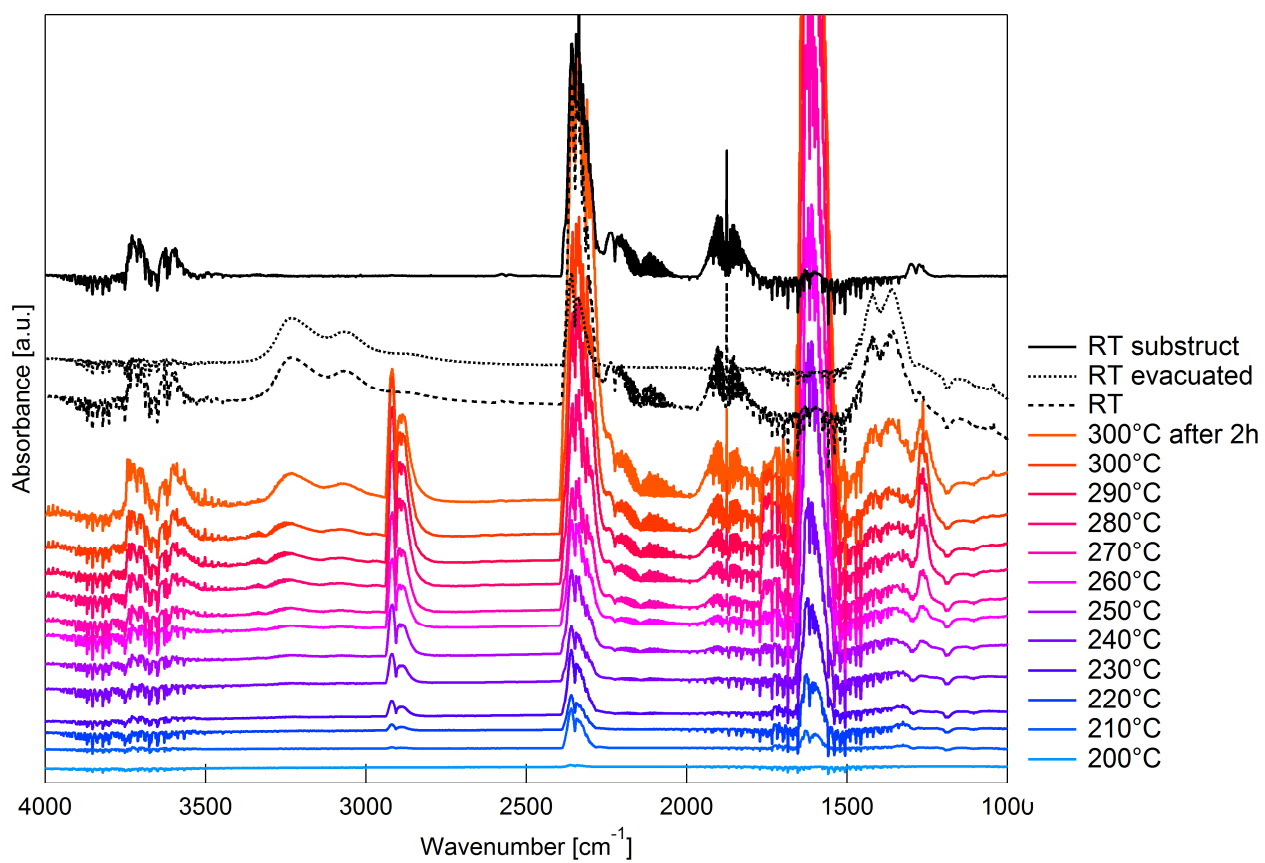

**Figure S2.** FT-IR spectra of released gas species from  $\text{LiNO}_3\text{-MIL-53(Al)}$  during heating.

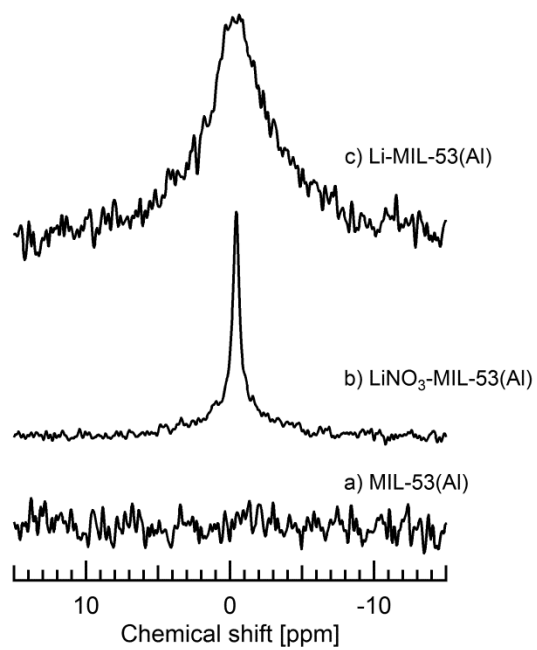

**Figure S3.**  $^7\text{Li}$  MAS NMR spectra of a) MIL-53(Al), b)  $\text{LiNO}_3\text{-MIL-53(Al)}$ , and c) Li-MIL-53(Al).

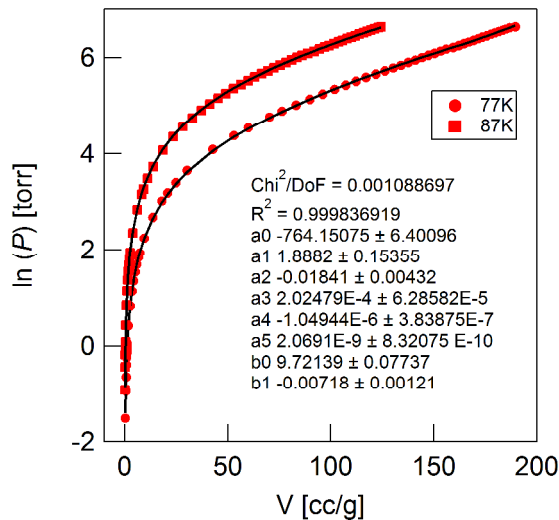

Fig 3.a) MIL-53(Al)

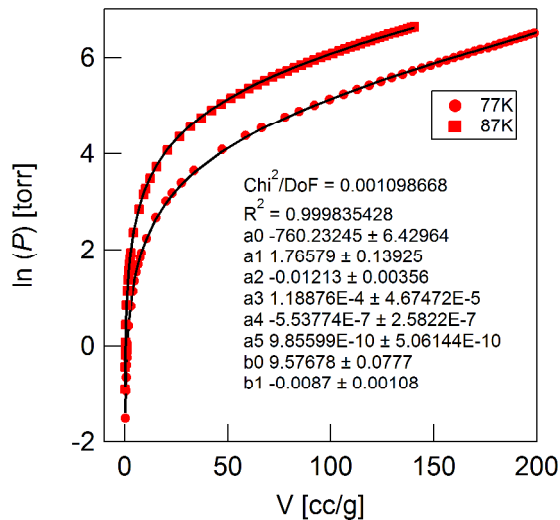

Fig 3.b). Li-MIL-53(Al)

**Figure S4.** Details of fitting and calculation of isosteric heat of hydrogen adsorption for a) MIL-53(Al) and b) Li-MIL-53(Al).

Both hydrogen isotherms (77K and 87K) for each material were fit to a virial equation of the form given in Equation 1.<sup>S1</sup>

The heat of adsorption is then calculated from the fitting parameters using Equation 2

$$\ln P = \ln N + \frac{1}{T} \sum_{i=0}^m a_i N^i + \sum_{i=0}^n b_i N^i \quad (1)$$

$$Q_{st} = -R \sum_{i=0}^m a_i N^i \quad (2)$$

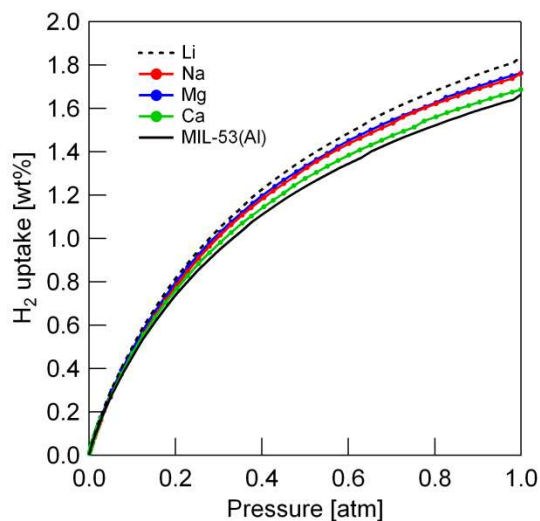

**Figure S5.** Hydrogen adsorption isotherms of other alkaline doped MIL-53(Al) at 77K.

## Reference

- (S1) Czepirski, L.; Jagiello, J., *Chem. Eng. Sci.* **1989**, *44*, 797-801.
